# Supplementary material for: In situ fabrication of two-dimensional g-C3N4/Ba5Ta4O15 nanosheet heterostructures with efficient charge separations and photocatalytic hydrogen evolution under visible light illumination
Source: Royal Society of Chemistry journal article supplement (doi:10.1039/c7dt04452f), 2018-01-01
Supplement: c7dt04452f1.pdf [file c7dt04452f1.pdf]

## Supplementary information

### ***In situ* fabrication of two-dimensional g-C<sub>3</sub>N<sub>4</sub>/Ba<sub>5</sub>Ta<sub>4</sub>O<sub>15</sub> nanosheet heterostructures with efficient charge separations and photocatalytic hydrogen evolution under visible light illumination**

Erbing Hua<sup>a</sup>, Gang Liu<sup>b</sup>, Guan Zhang<sup>c,\*</sup> and Xiaoxiang Xu<sup>a,\*</sup>

<sup>a</sup>*Shanghai Key Lab of Chemical Assessment and Sustainability, School of Chemical Science and Engineering, Tongji University, 1239 Siping Road, Shanghai, 200092, China, Email: [xxxu@tongji.edu.cn](mailto:xxxu@tongji.edu.cn), telephone: +86-21-65986919*

<sup>b</sup>*Shenyang National laboratory for Materials Science, Institute of Metal Research, Chinese Academy of Science, 72 Wenhua Road, Shenyang 110016, China*

<sup>c</sup>*Shenzhen Key Laboratory of Water Resources Utilization and Environmental Pollution Control, School of Civil and Environmental Engineering, Harbin Institute of Technology, Shenzhen, Shenzhen 518055, China*

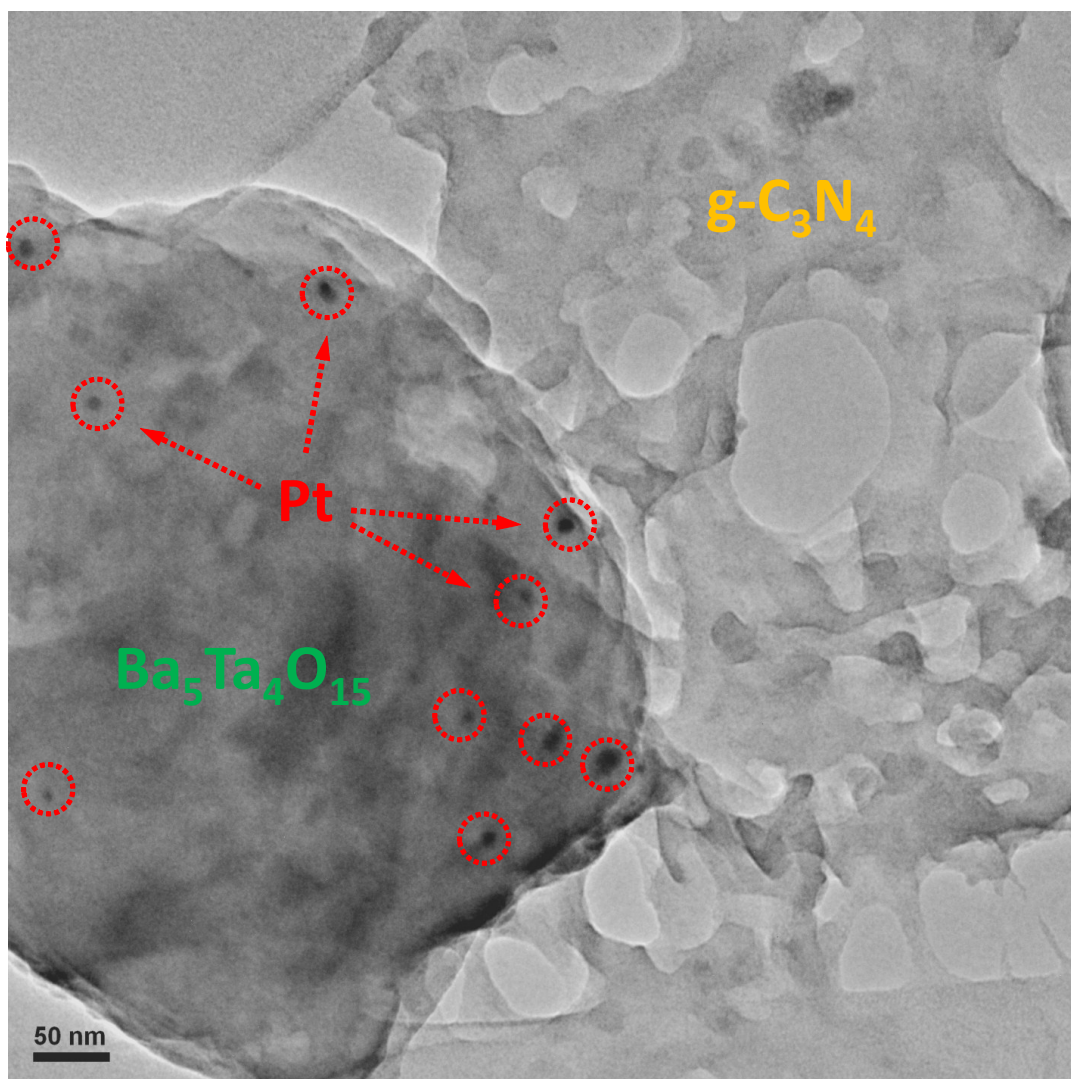

Figure S1. Transmission electron microscopy image of heterojunction (1:8) photo-deposited with Pt (1 wt%). The selectively deposition of Pt nanoparticles (black dot) on  $\text{Ba}_5\text{Ta}_4\text{O}_{15}$  confirms the charge transfer from  $\text{g-C}_3\text{N}_4$  to  $\text{Ba}_5\text{Ta}_4\text{O}_{15}$ .

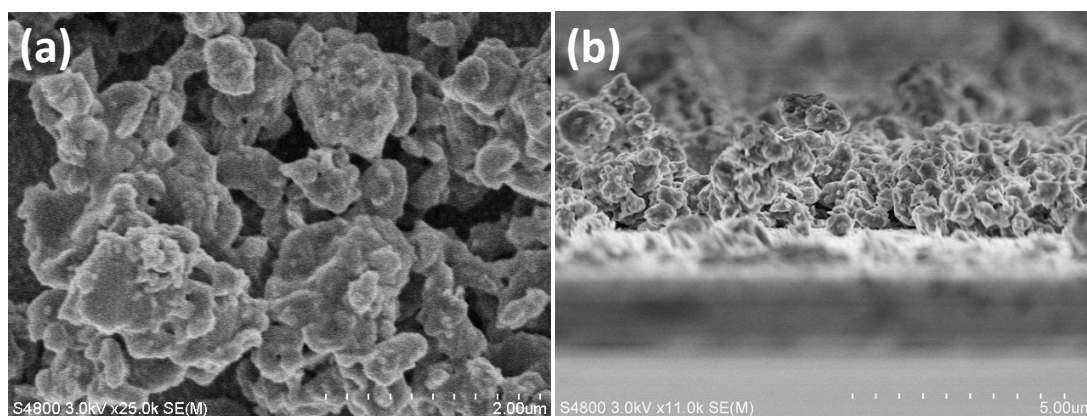

Figure S2. Field emission scanning electron microscopy images of as-prepared photoelectrode of heterojunctions (1:8): (a) electrode front and (b) electrode cross-section.

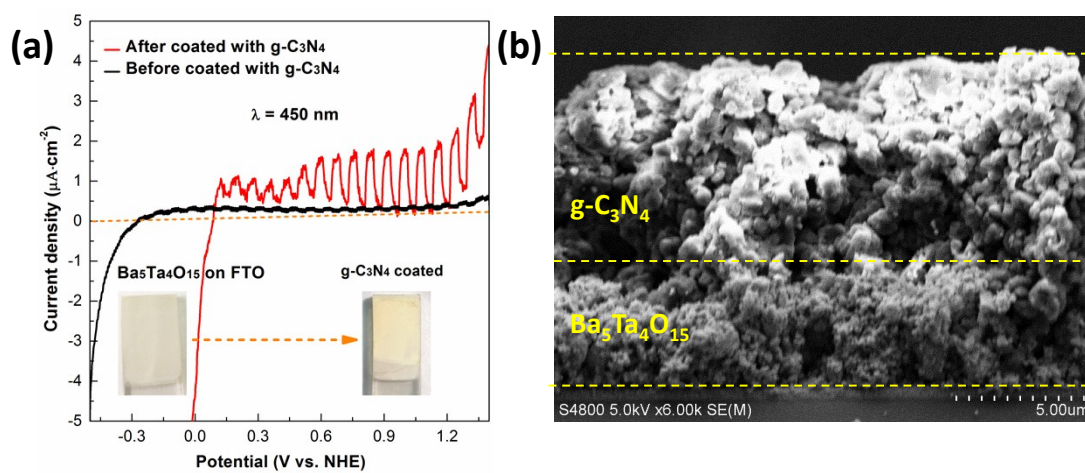

Figure S3. (a) LSV under chopped light illumination ( $\lambda = 450 \text{ nm}$ ) for  $\text{Ba}_5\text{Ta}_4\text{O}_{15}$  film on FTO before and after coated with  $\text{g-C}_3\text{N}_4$ ; (b) a SEM image of cross-section of photo-electrode used for such measurements, individual layer of  $\text{Ba}_5\text{Ta}_4\text{O}_{15}$  and  $\text{g-C}_3\text{N}_4$  has been labeled.
